# Supplementary material for: Comparative Analysis of Novel Strains of Porcine Astrovirus Type 3 in the USA
Source: MDPI journal article supplement (doi:10.3390/v13091859), 2021-09-17
Supplement: s1 [file s1]

**Supplemental materials:** Results for DisoRDPbind webserver.

Further information regarding results formatting and interpretations can be found at:

<http://biomine.cs.vcu.edu>. The annotations are encoded as follows: "1" denotes residues annotated with the particular type of binding, "0" denotes residues with annotations that include other types of disordered or ordered residues, and "x" denotes the residues that lack annotations

RNA-binding residues:

[illegible]

RNA-binding propensity:

0.092,0.058,0.052,0.058,0.057,0.051,0.052,0.058,0.060,0.062,0.071,0.061,0.068,0.068,0.075,0.072,0.073,0.085,0.073,0.077,0.077,0.086,0.091,0.087,0.082,0.079,0.069,0.072,0.073,0.083,0.065,0.071,0.073,0.072,0.055,0.053,0.055,0.053,0.043,0.042,0.053,0.064,0.058,0.054,0.057,0.064,0.066,0.064,0.053,0.044,0.038,0.046,0.043,0.039,0.044,0.042,0.060,0.058,0.058,0.064,0.066,0.065,0.080,0.094,0.096,0.077,0.096,0.085,0.092,0.092,0.072,0.066,0.056,0.051,0.055,0.052,0.047,0.043,0.048,0.055,0.072,0.091,0.081,0.073,0.059,0.081,0.079,0.081,0.085,0.113,0.111,0.102,0.098,0.117,0.095,0.096,0.091,0.109,0.112,0.108,0.089,0.099,0.110,0.119,0.102,0.087,0.081,0.106,0.106,0.077,0.068,0.063,0.063,0.065,0.064,0.080,0.069,0.057,0.052,0.047,0.056,0.044,0.045,0.045,0.044,0.065,0.058,0.065,0.074,0.073,0.054,0.046,0.048,0.045,0.039,0.031,0.030,0.031,0.030,0.032,0.026,0.023,0.021,0.022,0.018,0.019,0.016,0.019,0.020,0.017,0.018,0.014,0.012,0.014,0.011,0.010,0.010,0.011,0.012,0.018,0.021,0.020,0.020,0.014,0.019,0.023,0.024,0.023,0.022,0.018,0.016,0.021,0.020,0.021,0.021,0.022,0.029,0.027,0.032,0.031,0.029,0.022,0.024,0.020,0.019,0.022,0.019,0.018,0.016,0.018,0.018,0.014,0.012,0.010,0.011,0.011,0.013,0.013,0.010,0.012,0.015,0.019,0.019,0.017,0.021,0.020,0.027,0.030,0.028,0.037,0.029,0.027,0.024,0.024,0.020,0.024,0.019,0.021,0.025,0.025,0.017,0.017,0.020,0.020,0.019,0.018,0.015,0.016,0.013,0.011,0.011,0.010,0.012,0.008,0.007,0.008,0.009,0.011,0.016,0.016,0.020,0.024,0.027,0.026,0.022,0.020,0.022,0.027,0.032,0.032,0.042,0.034,0.035,0.047,0.046,0.047,0.046,0.041,0.049,0.044,0.046,0.042,0.039,0.034,0.040,0.052,0.041,0.039,0.044,0.051,0.040,0.046,0.049,0.056,0.041,0.044,0.049,0.043,0.048,0.052,0.053,0.047,0.052,0.058,0.079,0.075,0.080,0.084,0.095,0.095,0.096,0.097,0.072,0.071,0.074,0.070,0.069,0.085,0.089,0.111,0.099,0.108,0.112,0.137,0.135,0.109,0.096,0.103,0.115,0.128,0.126,0.117,0.139,0.138,0.145,0.150,0.158,0.185,0.228,0.238,0.216,0.251,0.248,0.214,0.223,0.262,0.243,0.227,0.199,0.253,0.249,0.231,0.258,0.282,0.270,0.245,0.240,0.263,0.244,0.227,0.235,0.238,0.261,0.266,0.265,0.305,0.318,0.354,0.283,0.325,0.353,0.357,0.335,0.333,0.352,0.397,0.415,0.428,0.448,0.470,0.475,0.488,0.498,0.482,0.500,0.550,0.523,0.454,0.468,0.414,0.396,0.380,0.328,0.314,0.336,0.343,0.343,0.319,0.333,0.279,0.245,0.263,0.263,0.297,0.230,0.263,0.267,0.174,0.155,0.149,0.130,0.155,0.144,0.134,0.135,0.119,0.101,0.072,0.071,0.077,0.081,0.067,0.056,0.066,0.070,0.079,0.065,0.071,0.073,0.074,0.058,0.061,0.050,0.045,0.038,0.045,0.032,0.032,0.033,0.035,0.031,0.033,0.041,0.038,0.047,0.056,0.049,0.056,0.060,0.037,0.041,0.049,0.041,0.042,0.040,0.046,0.038,0.032,0.037,0.049,0.044,0.062,0.081,0.085,0.102,0.091,0.084,0.099,

0.094,0.102,0.115,0.120,0.123,0.127,0.135,0.137,0.173,0.177,0.183,0.182,0.180,0.174,0.191,0.227,0.236,0.252,0.25  
2,0.302,0.252,0.349,0.333,0.320,0.317,0.321,0.309,0.305,0.294,0.223,0.184,0.160,0.148,0.123,0.131,0.119,0.118,0.  
096,0.092,0.097,0.074,0.079,0.066,0.073,0.092,0.089,0.087,0.086,0.084,0.110,0.128,0.147,0.172,0.179,0.207,0.195,  
0.203,0.183,0.221,0.231,0.241,0.249,0.239,0.190,0.175,0.121,0.132,0.118,0.124,0.118,0.084,0.101,0.087,0.083,0.07  
9,0.083,0.088,0.074,0.067,0.045,0.043,0.033,0.031,0.025,0.029,0.031,0.037,0.037,0.053,0.051,0.051,0.058,0.046,0.  
056,0.057,0.060,0.059,0.039,0.049,0.049,0.064,0.054,0.070,0.065,0.101,0.102,0.126,0.120,0.091,0.077,0.080,0.089,  
0.085,0.069,0.069,0.071,0.069,0.069,0.105,0.100,0.100,0.121,0.149,0.143,0.159,0.134,0.149,0.116,0.109,0.109,0.10  
8,0.108,0.107,0.105,0.125,0.122,0.111,0.115,0.110,0.101,0.106,0.133,0.129,0.122,0.125,0.104,0.097,0.086,0.112,0.

Protein-binding residues:

[illegible]

0.391,0.372,0.356,0.358,0.398,0.423,0.415,0.371,0.326,0.278,0.293,0.267,0.262,0.256,0.250,0.263,0.264,0.283,0.310,0.318,0.314,0.293,0.301,0.325,0.356,0.388,0.399,0.390,0.388,0.405,0.409,0.426,0.420,0.413,0.424,0.415,0.427,0.451,0.428,0.452,0.441,0.444,0.462,0.486,0.466,0.439,0.449,0.449,0.458,0.449,0.418,0.448,0.438,0.448,0.466,0.454,0.428,0.388,0.377,0.383,0.382,0.401,0.387,0.392,0.399,0.369,0.391,0.380,0.392,0.379,0.364,0.383,0.392,0.434,0.453,0.433,0.450,0.479,0.478,0.474,0.460,0.428,0.416,0.435,0.401,0.407,0.403,0.405,0.407,0.416,0.393,0.403,0.410,0.426,0.419,0.423,0.426,0.423,0.425,0.388,0.415,0.390,0.396,0.392,0.361,0.359,0.347,0.361,0.336,0.343,0.371,0.350,0.358,0.378,0.372,0.429,0.422,0.425,0.412,0.427,0.444,0.440,0.494,0.481,0.468,0.451,0.433,0.429,0.444,0.462,0.480,0.489,0.478,0.487,0.503,0.494,0.493,0.488,0.482,0.457,0.471,0.484,0.462,0.457,0.435,0.420,0.450,0.439,0.404,0.408,0.406,0.401,0.380,0.354,0.351,0.364,0.345,0.344,0.348,0.349,0.365,0.338,0.320,0.316,0.326,0.321,0.315,0.312,0.324,0.333,0.315,0.330,0.300,0.293,0.293,0.317,0.322,0.328,0.344,0.350,0.341,0.370,0.384,0.394,0.389,0.400,0.441,0.442,0.463,0.471,0.482,0.477,0.488,0.462,0.475,0.487,0.487,0.483,0.510,0.503,0.503,0.507,0.502,0.476,0.497,0.485,0.455,0.472,0.472,0.526,0.524,0.508,0.508,0.504,0.477,0.484,0.486,0.493,0.483,0.424,0.394,0.376,0.374,0.362,0.340,0.348,0.357,0.362,0.340,0.333,0.317,0.303,0.286,0.277,0.283,0.323,0.347,0.367,0.397,0.395,0.350,0.343,0.320,0.332,0.341,0.349,0.358,0.336,0.330,0.320,0.338,0.329,0.324,0.295,0.285,0.272,0.310,0.306,0.318,0.303,0.317,0.331,0.333,0.299,0.307,0.323,0.321,0.320,0.320,0.301,0.284,0.294,0.298,0.314,0.317,0.322,0.299,0.283,0.262,0.258,0.260,0.264,0.255,0.245,0.264,0.309,0.313,0.332,0.335,0.318,0.309,0.308,0.316,0.271,0.281,0.295,0.306,0.313,0.300,0.276,0.284,0.285,0.285,0.290,0.271,0.304,0.287,0.286,0.286,0.312,0.283,0.297,0.292,0.292,0.297,0.297,0.309,0.301,0.297,0.294,0.282,0.277,0.302,0.305,0.296,0.282,0.299,0.267,0.287,0.286,0.259,0.284,0.292,0.308,0.326,0.302,0.301,0.278,0.266,0.265,0.259,0.273,0.263,0.309,0.272,0.258,0.285,0.285,0.278,0.262,0.254,0.281,0.298,0.293,0.288,0.257,0.274,0.274,0.291,0.275,0.300,0.299,0.299,0.302,0.321,0.310,0.279,0.292,0.292,0.289,0.292,0.315,0.313,0.314,0.299,0.311,0.279,0.286,0.288,0.282,0.288,0.270,0.269,0.287,0.278,0.267,0.249,0.266,0.262,0.252,0.266,0.269,0.320,0.305,0.322,0.349,0.351,0.358,0.385,0.418,0.400,0.419,0.431,0.427,0.424,0.428,0.429,0.463,0.460,0.495,0.499,0.501,0.484,0.469,0.470,0.483,0.447,0.441,0.410,0.404,0.417,0.413,0.443,0.454,0.423,0.407,0.404,0.371,0.386,0.396,0.389,0.371,0.354,0.356,0.401,0.391,0.361,0.368,0.371,0.365,0.378,0.405,0.382,0.373,0.365,0.377,0.405,0.393,0.399,0.409,0.410,0.465,0.469,0.463,0.467,0.431,0.399,0.389,0.402,0.412,0.405,0.403,0.388,0.395,0.405,0.397,0.403,0.385,0.383,0.364,0.350,0.348,0.360,0.327,0.320,0.321,0.339,0.375,0.420,0.410,0.441,0.446,0.443,0.491,0.475,0.473,0.486,0.493,0.500,0.521,0.516,0.486,0.494,0.506,0.508,0.522,0.493,0.488,0.498,0.487,0.483,0.518,0.529,0.549,0.556,0.523,0.528,0.526,0.535,0.527,0.491,0.475,0.482,0.478,0.471,0.468,0.443,0.443,0.415,0.411,0.418,0.444,0.451,0.468,0.488,0.475,0.491,0.475,0.472,0.489,0.486,0.465,0.477,0.472,0.505,0.520,0.516,0.477,0.500,0.508,0.516,0.505,0.514,0.502,0.505,0.512,0.500,0.537,0.577,0.548,0.561,0.552,0.531,0.535,0.526,0.531,0.519,0.505,0.510,0.470,0.468,0.442,0.441,0.456,0.459,0.476,0.479,0.506,0.491,0.494,0.500,0.494,0.516,0.521,0.531,0.556,0.589,0.600,0.593,0.602,0.801,0.780,0.780,0.569,0.571,0.585,0.548,0.553,0.550,0.776,0.791,0.591,0.612,0.801,0.809,0.626,0.634,0.615,0.795,0.798,0.777,0.769,0.791,0.793,0.585,0.552,0.767,0.526,0.517,0.752,0.749,0.730,0.727,0.717,0.727,0.728,0.423,0.712,0.408,0.402,0.396,0.426,0.415,0.401,0.694,0.371,0.684,0.669,0.652,0.653,0.317,0.357,0.683,0.361,0.362,0.366,0.360,0.358,0.363,0.353,0.351,0.321,0.304,0.657,0.327,0.661,0.325,0.330,0.667,0.676,0.343,0.372,0.375,0.371,0.676,0.677,0.317,0.668,0.376,0.389,0.393,0.393,0.408,0.423,0.704,0.384,0.688,0.381,0.684,0.363,0.700,0.695

0.417,0.424,0.407,0.415,0.453,0.463,0.469,0.739,0.494,0.751,0.513,0.764,0.773,0.535,0.770,0.764,0.529,0.778,0.554,0.556,0.536,0.562,0.543,0.550,0.761,0.760,0.781,0.778,0.778,0.584,0.600,0.592,0.626,0.605,0.641,0.625,0.641,0.618,0.601,0.595,0.602,0.591,0.570,0.554,0.552,0.559,0.581,0.597,0.581,0.578,0.559,0.545,0.532,0.561,0.586,0.564,0.572,0.530,0.531,0.506,0.513,0.471,0.450,0.462,0.447,0.428,0.437,0.422,0.430,0.428,0.412,0.409,0.401,0.436,0.406,0.407,0.434,0.432,0.421,0.408,0.417,0.403,0.407,0.402,0.384,0.433,0.404,0.389,0.390,0.392,0.391,0.363,0.377,0.407,0.419,0.425,0.415,0.417,0.387,0.375,0.390,0.365,0.381,0.397,0.385,0.371,0.327,0.351,0.356,0.362,0.328,0.340,0.358,0.314,0.338,0.347,0.349,0.338,0.319,0.311,0.312,0.296,0.317,0.334,0.339,0.329,0.326,0.306,0.302,0.349,0.333,0.349,0.346,0.326,0.321,0.311,0.301,0.321,0.319,0.330,0.361,0.346,0.348,0.360,0.352,0.361,0.401,0.407,0.385,0.400,0.398,0.408,0.427,0.436,0.432,0.419,0.426,0.416,0.410,0.424,0.435,0.402,0.374,0.448,0.467,0.450,0.472,0.485,0.499,0.516,0.504,0.575,

>ORF1a Consensus sequence (1-845). Protein encoded sequence, where the lower (upper) case indicates the residue was predicted to interact (not to interact) with RNA/DNA/protein

MALPFDDTLKFGSAAARvkgrldsvartKLKDLLGDGPYFYDFGPLEVVDSSSKQLTVKMtSVQTVYVSSVV  
EDNSYVITYKFVPGVNEWVETEPVLHKPTALVGVLWREYNRYKDKTESLSQELSQRLEHSLLRHDYER  
VRPQQPATPRCRLGFITKLLIGLLIGsIMAHSTLAHKTPGTGLLGECLDTDVIDGKQVCVNFLPWNETET  
NPTDGDKTTTISWDHEGLDLLVLIAPYLVSWPMIATMVGFFYVATAEQPAYMLVSLLLATYSKAQVL  
ALAGLPFMDMPSVVTLWVSMVLVHSYDAVLSLWVALLLaftlsagvfmpdvrysdlvrgqlvvflvlfnylvvmmsl  
pnwlvfslvgyrvlrvltflvaekvevrgpdGKvVETRSTMPAWINKASNFLQTRFHQKIRTGISPTARVIPNGVIVV  
ETQDGSGTGFRCRNYLVtAGHVVTGTETPKIQWAGVTAYSKVVHRVPDKDIAFLAIPQELQDLPSYRLA  
KKVEDGPVVITSLEDSGALSVAVTEGVIVTDSITYAVQTRNGMSGSPVTNLDGRILAVHQTNTGFTGGA  
VILTDEdFPQPKKSAREQQleARIKELEAAMNQSSNHEDIVELVRAAVAREFKVLRTELsattfiqak**gknk**kh  
hrrrggKKRRRAVW**SEEEY**KELLEKGFSSKQLRDMAEVLRSHEEDPFGSDTESEGGFPEWSDVSDAESIERE  
WFGQSWEDCKPVKEEPQDTLPVHLKEKYTLDAYVISKEELRSFAKEFKDYVDKVEALIDKTVQQGKWL  
PSVNPTAIIIEELNDLWFGLNmLmwekGLVPFTqRkkikrvqknskgapkrpLptP

Three non globular protein disordered regions and three putative disordered RNA-protein binding regions were identified within the nsp1a with DisoRDPbind webserver, respectively. Protein disordered regions were identified between residues 206-222 (consensus WNETETNPTDGDKTTTI), 691- 709 (consensus EDPFGSDTESEGGFPEWSD) and 832-845 (consensus SKGAPKRGPLPTP). Putative disordered RNA-protein binding regions were located within residues 316-392 (AAFTLSAGVFMPDVRYSDLVRGQLVVFLVLFNYLVVMMSLPNWLVSFLVVGyrvlrvltflvaekv EVRGPdGKV), 633- 647 (SATTFIQAK**GKNKK**) and residues 807-813(MLMWEK).
